# Supplementary material for: Why Central Asia’s Mushiston is not a source for the Late Bronze Age tin ingots from the Uluburun shipwreck
Source: Frontiers journal article supplement (doi:10.3389/feart.2023.1211478), 2023-08-04
Supplement: Table_1.xlsx [file Table_1.xlsx]

## Sheet: Tabelle1
Supplementary Material S1 Complete tin isotope data of the tin ingots from Salcombe and Israel used for comparison in the study and published elsewhere (Berger et al., 2019b; Berger et al., 2022b). The data is reported relative to NIST SRM 3161a and Puratronic in-house reference material of CEZA (cf. Berger et al., 2019a; Berger et al., 2022a). Besides the single isotope values, δSn values are gi…
Lab no.	Original ID/sample no.	Country	Find location	Artefact	δ116Sn/120Sn	2SD	δ117Sn/120Sn	2SD	δ118Sn/120Sn	2SD	δ119Sn/120Sn	2SD	δ122Sn/120Sn	2SD	δ124Sn/120Sn	2SD	δ124Sn/116Sn	2SD	δ122Sn/116Sn	2SD	δ117Sn/119Sn	2SD	δ124Sn/116Sn	2SD	δSn	2SD	δSn	2SD	δ116Sn/120Sn	2SD	δ117Sn/120Sn	2SD	δ118Sn/120Sn	2SD	δ119Sn/120Sn	2SD	δ122Sn/120Sn	2SD	δ124Sn/120Sn	2SD	δ124Sn/116Sn	2SD	δ122Sn/116Sn	2SD	δ117Sn/119Sn	2SD	δ124Sn/116Sn	2SD	δSn
					NIST 3161a	[‰]	NIST 3161a	[‰]	NIST 3161a	[‰]	NIST 3161a	[‰]	NIST 3161a	[‰]	NIST 3161a	[‰]	NIST 3161a	[‰]	NIST 3161a	[‰]	NIST 3161a	[‰]	corrected	[‰]	NIST 3161a	[‰ u–1]	corrected	[‰ u–1]	Puratronic	[‰]	Puratronic	[‰]	Puratronic	[‰]	Puratronic	[‰]	Puratronic	[‰]	Puratronic	[‰]	Puratronic	[‰]	Puratronic	[‰]	Puratronic	[‰]	corrected	[‰]	Puratronic
MA-163233	2010,8032.295	United Kingdom	Salcombe	Tin ingot	-0.273521	0.0238072	-0.212781	0.0124281	-0.142566	0.00415168	-0.0813059	0.00507398	0.146423	0.00168405	0.283069	0.017571	0.556629	0.0412772	0.419972	0.0247364	-0.131478	0.0174193	0.356629	0.0412772	0.0698356	0.00110281	0.0448356	0.00110281	-0.138521	0.0238072	-0.109781	0.0124281	-0.0745656	0.00415168	-0.0443059	0.00507398	0.078423	0.00168405	0.159069	0.017571	0.297629	0.0412772	0.216972	0.0247364	-0.0654778	0.0174193	0.0976285	0.0412772	0.0367615
MA-163236	2010,8032.299	United Kingdom	Salcombe	Tin ingot	-0.252293	0.0177007	-0.209324	0.0142114	-0.122888	0.0145025	-0.0693924	0.00699844	0.118054	0.0192116	0.213733	0.0153136	0.466048	0.0329566	0.370365	0.0356159	-0.139934	0.00738837	0.266048	0.0329566	0.0608693	0.00211515	0.0358693	0.00211515	-0.117293	0.0177007	-0.106324	0.0142114	-0.0548877	0.0145025	-0.0323924	0.00699844	0.0500537	0.0192116	0.0897326	0.0153136	0.207048	0.0329566	0.167365	0.0356159	-0.073934	0.00738837	0.00704817	0.0329566	0.0277952
MA-163239	2010,8032.301	United Kingdom	Salcombe	Tin ingot	-0.239694	0.00852694	-0.187553	0.0116747	-0.12377	0.000588985	-0.074189	0.00564682	0.11621	0.00669749	0.223898	0.00418477	0.463614	0.0054257	0.35592	0.0066001	-0.113366	0.0169267	0.263614	0.0054257	0.059011	0.00116008	0.034011	0.00116008	-0.104694	0.00852694	-0.0845528	0.0116747	-0.0557701	0.000588985	-0.037189	0.00564682	0.04821	0.00669749	0.0998981	0.00418477	0.204614	0.0054257	0.15292	0.0066001	-0.0473656	0.0169267	0.00461362	0.0054257	0.0259368
MA-163242	2010,8032.316	United Kingdom	Salcombe	Tin ingot	-0.29585	0.0214145	-0.229805	0.0180939	-0.147454	0.01425	-0.084201	0.0044789	0.152787	0.0112473	0.280099	0.0155256	0.575997	0.0366527	0.448674	0.0285855	-0.145608	0.013734	0.375997	0.0366527	0.0733623	0.00140843	0.0483623	0.00140843	-0.16085	0.0214145	-0.126805	0.0180939	-0.0794536	0.01425	-0.047201	0.0044789	0.0847866	0.0112473	0.156099	0.0155256	0.316997	0.0366527	0.245674	0.0285855	-0.0796079	0.013734	0.116997	0.0366527	0.0402882
MA-163245	2013,8032.8	United Kingdom	Salcombe	Tin ingot	-0.379547	0.0108775	-0.29073	0.0142516	-0.185494	0.00387765	-0.106962	0.00729625	0.185618	0.00391971	0.349698	0.0158307	0.729359	0.0239208	0.565253	0.0143728	-0.183776	0.00696808	0.529359	0.0239208	0.0927559	0.00169971	0.0677559	0.00169971	-0.244547	0.0108775	-0.18773	0.0142516	-0.117494	0.00387765	-0.069962	0.00729625	0.117618	0.00391971	0.225698	0.0158307	0.470359	0.0239208	0.362253	0.0143728	-0.117776	0.00696808	0.270359	0.0239208	0.0596818
MA-163248	2013,8032.11	United Kingdom	Salcombe	Tin ingot	-0.309434	0.012477	-0.239538	0.0143049	-0.155322	0.00656078	-0.08436	0.00339006	0.147172	0.00554323	0.288114	0.00860483	0.597605	0.0176944	0.456649	0.00798283	-0.155182	0.0176865	0.397605	0.0176944	0.0758681	0.000891086	0.0508681	0.000891086	-0.174434	0.012477	-0.136538	0.0143049	-0.087322	0.00656078	-0.04736	0.00339006	0.0791721	0.00554323	0.164114	0.00860483	0.338605	0.0176944	0.253649	0.00798283	-0.0891818	0.0176865	0.138605	0.0176944	0.042794
MA-163251	2010,8032.318	United Kingdom	Salcombe	Tin ingot	-0.282986	0.00576497	-0.219438	0.00489076	-0.14051	0.00617853	-0.0819485	0.00515175	0.127332	0.00908462	0.252262	0.0143735	0.535286	0.0148973	0.410347	0.0033183	-0.137493	0.00878511	0.335286	0.0148973	0.0682479	0.00121844	0.0432479	0.00121844	-0.147986	0.00576497	-0.116438	0.00489076	-0.0725099	0.00617853	-0.0449485	0.00515175	0.059332	0.00908462	0.128262	0.0143735	0.276286	0.0148973	0.207347	0.0033183	-0.0714929	0.00878511	0.0762857	0.0148973	0.0351738
MA-163254	2010,8032.322	United Kingdom	Salcombe	Tin ingot	-0.400524	0.00614321	-0.303308	0.00354064	-0.20293	0.00363804	-0.106088	0.00678139	0.192148	0.0116459	0.363229	0.0093265	0.763886	0.0153072	0.592774	0.017663	-0.19723	0.00467085	0.563886	0.0153072	0.0973485	0.00168981	0.0723485	0.00168981	-0.265524	0.00614321	-0.200308	0.00354064	-0.13493	0.00363804	-0.0690878	0.00678139	0.124148	0.0116459	0.239229	0.0093265	0.504886	0.0153072	0.389774	0.017663	-0.13123	0.00467085	0.304886	0.0153072	0.0642743
MA-163257	2010,8032.323	United Kingdom	Salcombe	Tin ingot	-0.291024	0.0122432	-0.236363	0.00609117	-0.138662	0.00873808	-0.0782863	0.003196	0.136162	0.0080849	0.257276	0.00820222	0.548345	0.0204315	0.42722	0.0199911	-0.158081	0.00435483	0.348345	0.0204315	0.0706774	0.00186699	0.0456774	0.00186699	-0.156024	0.0122432	-0.133363	0.00609117	-0.0706618	0.00873808	-0.0412863	0.003196	0.0681617	0.0080849	0.133276	0.00820222	0.289345	0.0204315	0.22422	0.0199911	-0.0920805	0.00435483	0.0893451	0.0204315	0.0376033
MA-163260	2013,8032.3	United Kingdom	Salcombe	Tin ingot	-0.248092	0.00690447	-0.201332	0.00797008	-0.120276	0.00841232	-0.0711062	0.00691654	0.125291	0.00412344	0.231232	0.00626043	0.479358	0.012588	0.373408	0.010948	-0.130229	0.0143772	0.279358	0.012588	0.0614733	0.0014239	0.0364733	0.0014239	-0.113092	0.00690447	-0.0983321	0.00797008	-0.0522764	0.00841232	-0.0341062	0.00691654	0.0572905	0.00412344	0.107232	0.00626043	0.220358	0.012588	0.170408	0.010948	-0.0642289	0.0143772	0.0203577	0.012588	0.0283992
MA-176602	2005,0503.19	United Kingdom	Salcombe	Tin lump	-0.200524	0.00488858	-0.161259	0.0115541	-0.101545	0.00518379	-0.0666686	0.00793251	0.0966633	0.0154399	0.1831	0.0176049	0.383629	0.0210825	0.297191	0.0151501	-0.0945915	0.0118444	0.183629	0.0210825	0.0491804	0.00133089	0.0241804	0.00133089	-0.0655238	0.00488858	-0.0582592	0.0115541	-0.0335447	0.00518379	-0.0296686	0.00793251	0.0286633	0.0154399	0.0591002	0.0176049	0.124629	0.0210825	0.0941908	0.0151501	-0.0285915	0.0118444	-0.0753705	0.0210825	0.0161063
MA-175618	8251	Israel	Haifa	Tin ingot	-0.306893	0.00820058	-0.242123	0.00516091	-0.149786	0.00387676	-0.084595	0.00625398	0.146173	0.00960315	0.27844	0.00920552	0.585389	0.0122711	0.453109	0.0118723	-0.157533	0.00335451	0.385389	0.0122711	0.0748654	0.00141771	0.0498654	0.00141771	-0.171893	0.00820058	-0.139123	0.00516091	-0.0817862	0.00387676	-0.047595	0.00625398	0.0781728	0.00960315	0.15444	0.00920552	0.326389	0.0122711	0.250109	0.0118723	-0.091533	0.00335451	0.126389	0.0122711	0.0417912
MA-175619	8252	Israel	Haifa	Tin ingot	-0.320323	0.0155491	-0.246238	0.0164181	-0.155861	0.0102942	-0.0905735	0.00431902	0.152018	0.00833548	0.291077	0.0160969	0.611465	0.0313461	0.472391	0.0230405	-0.155669	0.0125639	0.411465	0.0313461	0.0778261	0.00142647	0.0528261	0.00142647	-0.185323	0.0155491	-0.143238	0.0164181	-0.0878605	0.0102942	-0.0535735	0.00431902	0.0840179	0.00833548	0.167077	0.0160969	0.352465	0.0313461	0.269391	0.0230405	-0.0896689	0.0125639	0.152465	0.0313461	0.044752
MA-175620	53/95 (95/2)	Israel	Hishuley Carmel	Tin ingot	-0.296626	0.0053489	-0.232658	0.00229081	-0.149245	0.00449138	-0.0893748	0.00837304	0.145136	0.00899509	0.271398	0.00787925	0.568073	0.0131953	0.4418	0.0127929	-0.143287	0.0061527	0.368073	0.0131953	0.0726549	0.00158293	0.0476549	0.00158293	-0.161626	0.0053489	-0.129658	0.00229081	-0.0812455	0.00449138	-0.0523748	0.00837304	0.0771364	0.00899509	0.147398	0.00787925	0.309073	0.0131953	0.2388	0.0127929	-0.077287	0.0061527	0.109073	0.0131953	0.0395807
MA-175621	53/95 (95/3)	Israel	Hishuley Carmel	Tin ingot	-0.370255	0.0236444	-0.288786	0.0194487	-0.184235	0.0147871	-0.103573	0.00185807	0.174671	0.0107103	0.340334	0.028611	0.710696	0.0517165	0.545007	0.0334173	-0.18522	0.0185493	0.510696	0.0517165	0.0904661	0.00131842	0.0654661	0.00131842	-0.235255	0.0236444	-0.185786	0.0194487	-0.116235	0.0147871	-0.0665731	0.00185807	0.106671	0.0107103	0.216334	0.028611	0.451696	0.0517165	0.342007	0.0334173	-0.11922	0.0185493	0.251696	0.0517165	0.057392
MA-175668	82–132	Israel	Hishuley Carmel	Tin ingot	-0.383138	0.0175327	-0.290877	0.0204776	-0.186384	0.0074644	-0.106718	0.015002	0.175752	0.0143112	0.341439	0.00895657	0.724692	0.0241865	0.558978	0.0149816	-0.184168	0.0085338	0.524692	0.0241865	0.0922076	0.00174937	0.0672076	0.00174937	-0.248138	0.0175327	-0.187877	0.0204776	-0.118384	0.0074644	-0.0697178	0.015002	0.107752	0.0143112	0.217439	0.00895657	0.465692	0.0241865	0.355978	0.0149816	-0.118168	0.0085338	0.265692	0.0241865	0.0591334
MA-175669	82–131	Israel	Hishuley Carmel	Tin ingot	-0.351373	0.00757492	-0.2715	0.00477208	-0.172981	0.0105593	-0.0981186	0.00766413	0.163177	0.0247822	0.314414	0.0119468	0.665875	0.0164623	0.514617	0.0246905	-0.173388	0.00314065	0.465875	0.0164623	0.0849926	0.00156609	0.0599926	0.00156609	-0.216373	0.00757492	-0.1685	0.00477208	-0.104981	0.0105593	-0.0611186	0.00766413	0.0951768	0.0247822	0.190414	0.0119468	0.406875	0.0164623	0.311617	0.0246905	-0.107388	0.00314065	0.206875	0.0164623	0.0519185
MA-175671	82–133	Israel	Hishuley Carmel	Tin ingot	-0.281605	0.00956244	-0.21625	0.00808122	-0.137689	0.0053355	-0.0782589	0.00290375	0.127768	0.0106013	0.253265	0.0131696	0.53491	0.0227383	0.409403	0.00103699	-0.137994	0.00517814	0.33491	0.0227383	0.0679981	0.00109157	0.0429981	0.00109157	-0.146605	0.00956244	-0.11325	0.00808122	-0.0696891	0.0053355	-0.0412589	0.00290375	0.0597678	0.0106013	0.129265	0.0131696	0.27591	0.0227383	0.206403	0.00103699	-0.0719942	0.00517814	0.0759101	0.0227383	0.0349239
MA-175670	82–130	Israel	Hishuley Carmel	Tin ingot	-0.310745	0.00799371	-0.237885	0.0195461	-0.151095	0.00768108	-0.0878403	0.0154904	0.14404	0.0112661	0.276988	0.0135105	0.587791	0.0196241	0.454829	0.017533	-0.150049	0.0134654	0.387791	0.0196241	0.0749308	0.00149749	0.0499308	0.00149749	-0.175745	0.00799371	-0.134885	0.0195461	-0.0830947	0.00768108	-0.0508403	0.0154904	0.0760396	0.0112661	0.152988	0.0135105	0.328791	0.0196241	0.251829	0.017533	-0.0840486	0.0134654	0.128791	0.0196241	0.0418567
MA-175672	none	Israel	Hishuley Carmel	Tin ingot	-0.291389	0.00934247	-0.22467	0.0139443	-0.145018	0.0070471	-0.0858322	0.00601301	0.130148	0.00724502	0.259604	0.00299139	0.551039	0.0105266	0.421571	0.0164873	-0.138842	0.0179226	0.351039	0.0105266	0.0701613	0.00131049	0.0451613	0.00131049	-0.156389	0.00934247	-0.12167	0.0139443	-0.0770181	0.0070471	-0.0488322	0.00601301	0.0621479	0.00724502	0.135604	0.00299139	0.292039	0.0105266	0.218571	0.0164873	-0.0728417	0.0179226	0.0920385	0.0105266	0.0370871
MA-175673	133-ℸ (53-ס)	Israel	Hishuley Carmel	Tin ingot	-0.313535	0.0163318	-0.241484	0.0112424	-0.155739	0.00693288	-0.0883976	0.00785693	0.147695	0.0145029	0.277452	0.01548	0.591045	0.0318185	0.461275	0.0303448	-0.153091	0.018722	0.391045	0.0318185	0.0756966	0.00165647	0.0506966	0.00165647	-0.178535	0.0163318	-0.138484	0.0112424	-0.0877392	0.00693288	-0.0513976	0.00785693	0.0796946	0.0145029	0.153452	0.01548	0.332045	0.0318185	0.258275	0.0303448	-0.087091	0.018722	0.132045	0.0318185	0.0426225
MA-175674	none	Israel	Hishuley Carmel	Tin ingot	-0.36523	0.00883382	-0.285045	0.006519	-0.178695	0.00107058	-0.0990169	0.00446447	0.166716	0.00720681	0.327436	0.00684594	0.692765	0.0150104	0.532021	0.0160436	-0.186035	0.0108684	0.492765	0.0150104	0.088395	0.00148315	0.063395	0.00148315	-0.23023	0.00883382	-0.182045	0.006519	-0.110695	0.00107058	-0.0620169	0.00446447	0.0987157	0.00720681	0.203436	0.00684594	0.433765	0.0150104	0.329021	0.0160436	-0.120035	0.0108684	0.233765	0.0150104	0.0553209
MA-175675	91–479	Israel	Hishuley Carmel	Tin ingot	-0.411033	0.0138179	-0.320118	0.00469062	-0.200619	0.00324645	-0.11117	0.00409566	0.18932	0.00871797	0.370256	0.0160394	0.781432	0.0297121	0.600462	0.0223606	-0.208959	0.00276477	0.581432	0.0297121	0.0996383	0.00165193	0.0746383	0.00165193	-0.276033	0.0138179	-0.217118	0.00469062	-0.132619	0.00324645	-0.0741698	0.00409566	0.12132	0.00871797	0.246256	0.0160394	0.522432	0.0297121	0.397462	0.0223606	-0.142959	0.00276477	0.322432	0.0297121	0.0665641
MA-175676	26/92 (33/2)	Israel	Hishuley Carmel	Tin ingot	-0.238981	0.0264448	-0.188192	0.0178888	-0.117888	0.0129262	-0.0705158	0.00983801	0.114473	0.0127865	0.221306	0.0250408	0.460307	0.0514852	0.353469	0.0391801	-0.117677	0.00870466	0.260307	0.0514852	0.0586126	0.00101625	0.0336126	0.00101625	-0.103981	0.0264448	-0.0851916	0.0178888	-0.0498885	0.0129262	-0.0335158	0.00983801	0.0464727	0.0127865	0.0973056	0.0250408	0.201307	0.0514852	0.150469	0.0391801	-0.0516772	0.00870466	0.0013072	0.0514852	0.0255385
MA-175677	1637/89 (30/2)	Israel	Hishuley Carmel	Tin ingot	-0.288673	0.0179149	-0.231306	0.0194681	-0.143785	0.0136015	-0.0892146	0.00880113	0.138787	0.0133632	0.26701	0.016135	0.555728	0.0337308	0.427495	0.0276631	-0.142096	0.0134668	0.355728	0.0337308	0.0709852	0.0014418	0.0459852	0.0014418	-0.153673	0.0179149	-0.128306	0.0194681	-0.0757854	0.0136015	-0.0522146	0.00880113	0.0707871	0.0133632	0.14301	0.016135	0.296728	0.0337308	0.224495	0.0276631	-0.0760961	0.0134668	0.0967281	0.0337308	0.037911
MA-175678	1637/89 (30/3)	Israel	Hishuley Carmel	Tin ingot	-0.304904	0.0153438	-0.239825	0.00857898	-0.144931	0.00460659	-0.0891592	0.00398065	0.141585	0.0124783	0.272478	0.011882	0.577437	0.0263637	0.446531	0.0277527	-0.150671	0.0118847	0.377437	0.0263637	0.0737917	0.00162162	0.0487917	0.00162162	-0.169904	0.0153438	-0.136825	0.00857898	-0.076931	0.00460659	-0.0521592	0.00398065	0.0735845	0.0124783	0.148478	0.011882	0.318437	0.0263637	0.243531	0.0277527	-0.0846707	0.0118847	0.118437	0.0263637	0.0407176
MA-175679	26/92 (35/1)	Israel	Hishuley Carmel	Tin ingot	-0.296388	0.0114983	-0.229751	0.00823101	-0.145933	0.00503698	-0.0857179	0.00371843	0.146696	0.0182137	0.284644	0.0198092	0.581084	0.0301843	0.443123	0.0293525	-0.144037	0.00893873	0.381084	0.0301843	0.0734408	0.00100449	0.0484408	0.00100449	-0.161388	0.0114983	-0.126751	0.00823101	-0.0779328	0.00503698	-0.0487179	0.00371843	0.0786961	0.0182137	0.160644	0.0198092	0.322084	0.0301843	0.240123	0.0293525	-0.078037	0.00893873	0.122084	0.0301843	0.0403667
MA-176924	G19	Israel	Kfar Samir south	Tin ingot	-0.230946	0.010786	-0.186504	0.00294044	-0.117457	0.00749255	-0.0729877	0.00598291	0.205062	0.0224956	0.270042	0.0244587	0.501016	0.0143567	0.436034	0.0117309	-0.113518	0.00633881	0.301016	0.0143567	0.0648032	0.00498147	0.0398032	0.00498147	-0.0959458	0.010786	-0.0835035	0.00294044	-0.0494567	0.00749255	-0.0359877	0.00598291	0.137062	0.0224956	0.146042	0.0244587	0.242016	0.0143567	0.233034	0.0117309	-0.0475181	0.00633881	0.0420163	0.0143567	0.031729
MA-176925	G21	Israel	Kfar Samir south	Tin ingot	-0.268985	0.00498181	-0.211251	0.0114288	-0.136323	0.00533873	-0.0808013	0.00827459	0.223017	0.0179418	0.301368	0.0239408	0.570396	0.0289393	0.492042	0.0229302	-0.130453	0.0161344	0.370396	0.0289393	0.0736359	0.00508561	0.0486359	0.00508561	-0.133985	0.00498181	-0.108251	0.0114288	-0.0683229	0.00533873	-0.0438013	0.00827459	0.155017	0.0179418	0.177368	0.0239408	0.311396	0.0289393	0.289042	0.0229302	-0.0644528	0.0161344	0.111396	0.0289393	0.0405618
MA-176926	G22	Israel	Kfar Samir south	Tin ingot	-0.330732	0.00965727	-0.264207	0.00893868	-0.169391	0.00415835	-0.0942873	0.0048876	0.288936	0.0160961	0.379302	0.0108313	0.71012	0.0196868	0.619747	0.0257211	-0.169926	0.00667645	0.51012	0.0196868	0.0920503	0.00691221	0.0670503	0.00691221	-0.195732	0.00965727	-0.161207	0.00893868	-0.101391	0.00415835	-0.0572873	0.0048876	0.220936	0.0160961	0.255302	0.0108313	0.45112	0.0196868	0.416747	0.0257211	-0.103926	0.00667645	0.25112	0.0196868	0.0589761
MA-213340	84-76	Israel	Kfar Samir south	Tin ingot	-0.254051	0.00859771	-0.210705	0.014434	-0.12547	0.011418	-0.0720849	0.00353909	0.141673	0.0204186	0.247156	0.0056259	0.501308	0.00308541	0.395804	0.0161902	-0.138628	0.011019	0.301308	0.00308541	0.0644287	0.0014923	0.0394287	0.0014923	-0.119051	0.00859771	-0.107705	0.014434	-0.0574697	0.011418	-0.0350849	0.00353909	0.0736727	0.0204186	0.123156	0.0056259	0.242308	0.00308541	0.192804	0.0161902	-0.0726282	0.011019	0.0423083	0.00308541	0.0314287
MA-213341	20	Israel	Kfar Samir south	Tin ingot	-0.308641	0.00420665	-0.243295	0.0125064	-0.151276	0.00336402	-0.0837994	0.00810034	0.176376	0.00100161	0.295874	0.0143505	0.604693	0.0169006	0.48516	0.00495849	-0.159509	0.0141075	0.404693	0.0169006	0.0775858	0.00181614	0.0525858	0.00181614	-0.173641	0.00420665	-0.140295	0.0125064	-0.0832759	0.00336402	-0.0467994	0.00810034	0.108376	0.00100161	0.171874	0.0143505	0.345693	0.0169006	0.28216	0.00495849	-0.0935086	0.0141075	0.145693	0.0169006	0.0445858
This electronic Supplementary Material is part of the article Berger, D., Kaniuth, K., Brügmann, G., Pernicka, E., Why Central Asia' s Mushiston is not a source for the Late Bronze Age tin ingots from the Uluburun shipwreck, Frontiers in Earth Science, doi: 10.3389/feart.2023.1211478, corresponding author: Berger, D., Curt-Engelhorn-Zentrum Archäometrie Mannheim, daniel.berger@ceza.de
[truncated: 4 more columns]
